# Supplementary material
Source: publisher figshare collection journal article supplement (https://acs.figshare.com/ndownloader/files/30447156)
Supplement: Supplementary file 1 [file 30447156]

## **Supporting information**

### **Well-Designed Construction of Yttrium Orthovanadate Confined on Graphitic Carbon Nitride Sheets: Electrochemical Investigation of Dimetridazole**

Balasubramanian Sriram,<sup>†</sup> Jeena N Baby,<sup>‡</sup> Sea-Fue Wang,<sup>†,\*</sup> Yung-Fu Hsu,<sup>†,\*</sup> Abhikha Sherlin V,  
<sup>‡</sup> Mary George<sup>‡,\*</sup>

<sup>†</sup>*Department of Materials and Mineral Resources Engineering, National Taipei University of Technology, Taipei 106, Taiwan.*

<sup>‡</sup>*Department of Chemistry, Stella Maris College, Affiliated to the University of Madras, Chennai 600 086, Tamil Nadu, India.*

#### **Corresponding authors**

S.-F. Wang, Email: [sfwang@ntut.edu.tw](mailto:sfwang@ntut.edu.tw).

Y.-F. Hsu, Email: [yfhsu@ntut.edu.tw](mailto:yfhsu@ntut.edu.tw).

M. George, Email: [marygeorge@stellamariscollege.edu.in](mailto:marygeorge@stellamariscollege.edu.in).

No. of pages: 6

No. of Figure: 6

| Entry            | Table of Contents                                                                                                                                                          | Page No. |
|------------------|----------------------------------------------------------------------------------------------------------------------------------------------------------------------------|----------|
|                  | <i>Chemicals and reagents</i>                                                                                                                                              | S2       |
|                  | <i>Instrumentation and methods</i>                                                                                                                                         | S3       |
| <b>Figure S1</b> | (a, b) FE-SEM images of CN sheets, (c, d) YVO <sub>4</sub> nanosphere and (e, f) YVO <sub>4</sub> @CN nanocomposite.                                                       | S4       |
| <b>Figure S2</b> | EDX spectrum of YVO <sub>4</sub> @CN composite.                                                                                                                            | S5       |
| <b>Figure S3</b> | Effect of YVO <sub>4</sub> @CN catalyst preparing amount (1 → 2.5 mg/mL) with the presence of 50 μM DMZ in 0.1 M PB (pH 7.0) at a scanning rate of 50 mV s <sup>-1</sup> . | S5       |
| <b>Figure S4</b> | (a) Cycle stability of YVO <sub>4</sub> @CN/GCE composite without presence of DMZ. (b) Effect on different pH capacitive current of YVO <sub>4</sub> @CN.                  | S5       |
| <b>Figure S5</b> | Cycle stability of YVO <sub>4</sub> @CN composite in the presence of DMZ.                                                                                                  | S6       |
| <b>Figure S6</b> | Real-sample analysis of DMZ in (a) milk and (b) egg samples.                                                                                                               | S6       |

## Chemicals and reagents

Yttrium(III) nitrate (Y(NO<sub>3</sub>)<sub>3</sub>), ammonium metavanadate (NH<sub>4</sub>VO<sub>3</sub>), melamine, dimetridazole (DMZ), urea, sodium hydroxide (NaOH) and all the chemicals used in the study are of analytical grade and are received from Sigma-Aldrich & Merck, Alfa Aesar and Showa Chemical Industry Co., Ltd. Ultrapure fresh water is obtained from a millipore water purification system (Milli-Q, specific resistivity > 18 MΩcm, S.A.; Molsheim, France) and is used in all the experiments. Sodium phosphate dibasic and sodium dihydrogen phosphate (Na<sub>2</sub>HPO<sub>4</sub> and NaH<sub>2</sub>PO<sub>4</sub>) are utilized to prepare 0.1 M (pH 7) PB (phosphate buffer). All the electrochemical experiments are carried out using 0.1 M PB (pH 7) as the supporting electrolyte.

## Instrumentation and methods

Phase configuration is identified using X-ray diffraction analysis (XRD) (Bruker (XRD, Rigaku D/maxB, DMX-2200)) instrument. Perkin Elmer spectrometer is employed to record Fourier transform infrared spectra in the range of 400-4000  $\text{cm}^{-1}$ . X-ray photoelectron spectroscopy (XPS) analysis (PHI 5000 Versa Prob II, FEI Inc.) is applied to quantitatively analyse the chemical composition of the materials. The surface morphology and the elemental composition are studied utilizing high resolution (HR) transmission electron microscopy (TEM) (H-7600, Hitachi-Japan) operating at 200 kV and energy dispersive X-ray spectroscopy by using JOEL Serive Advanced Technology. By utilizing these characterization methods, the physical properties of the as-prepared  $\text{YVO}_4\text{@CN}$  nanocomposite are investigated. The electrochemical properties are explored using electrochemical impedance spectroscopy (EIS) through Autolab (PGSTAT101). CHI 1211c electrocatalytic workstation is functional to carry out the electrochemical measurements like cyclic voltammetry (CV) and amperometry  $i-t$  in a conventional three electrode cell. Here, the modified GCE (surface area = 0.072  $\text{cm}^2$ ), saturated  $\text{Ag|AgCl}$  and Pt wire are active as working, reference and counter electrodes, respectively.

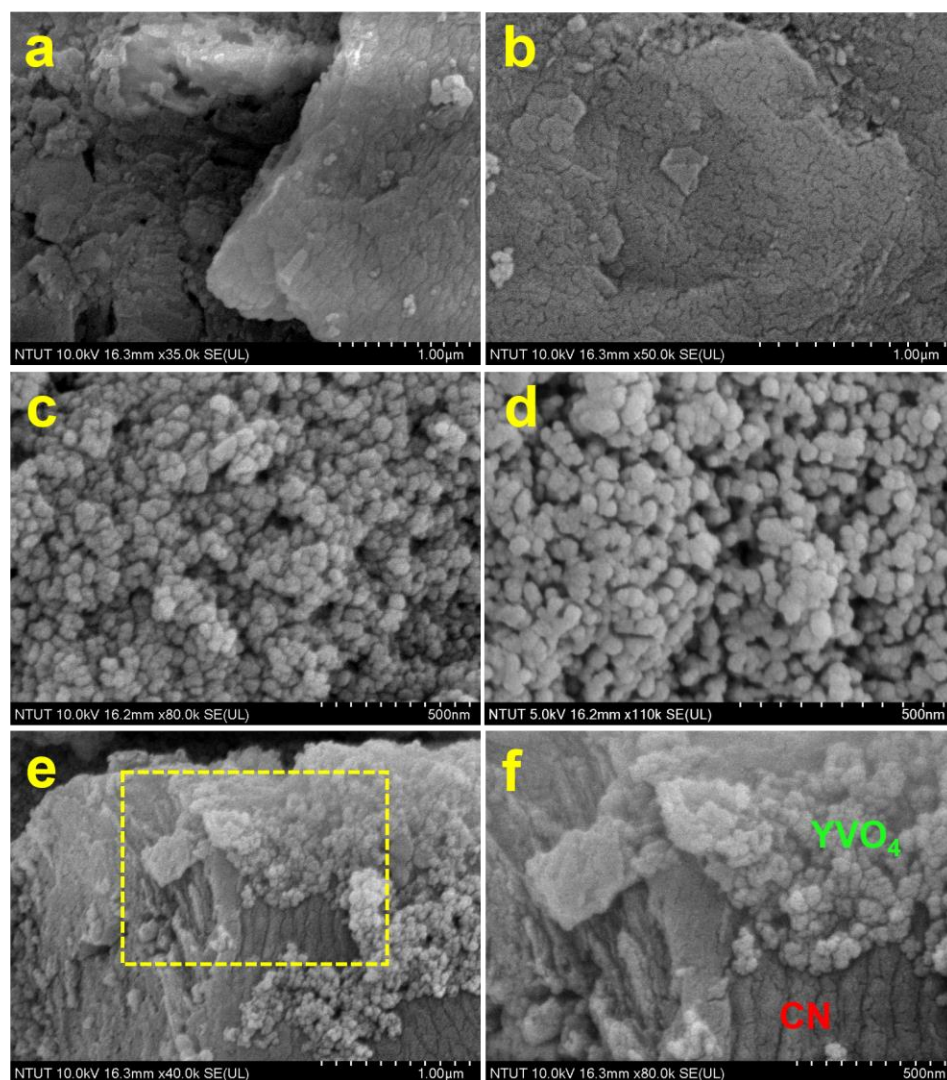

**Figure S1.** (a, b) FE-SEM images of CN sheets, (c, d) YVO<sub>4</sub> nanosphere and (e, f) YVO<sub>4</sub>@CN nanocomposite.

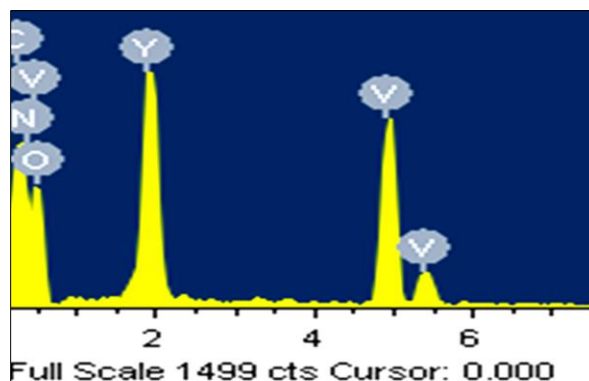

**Figure S2.** EDX spectrum of YVO<sub>4</sub>@CN composite.

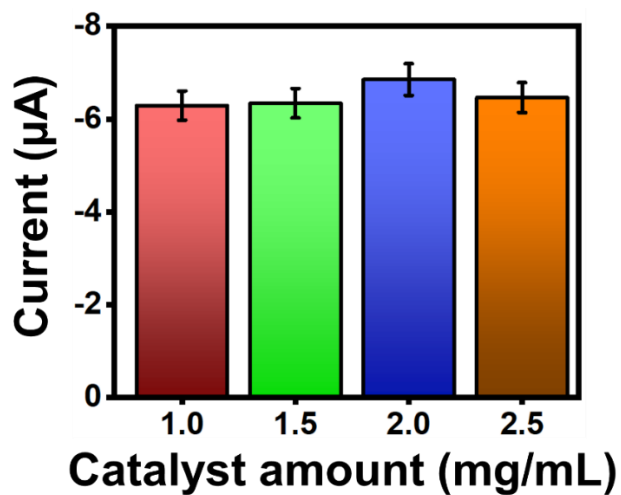

**Figure S3.** Effect of YVO<sub>4</sub>@CN catalyst preparing amount (1 → 2.5 mg/mL) with the presence of 50 μM DMZ in 0.1 M PB (pH 7.0) at a scanning rate of 50 mV s<sup>-1</sup>.

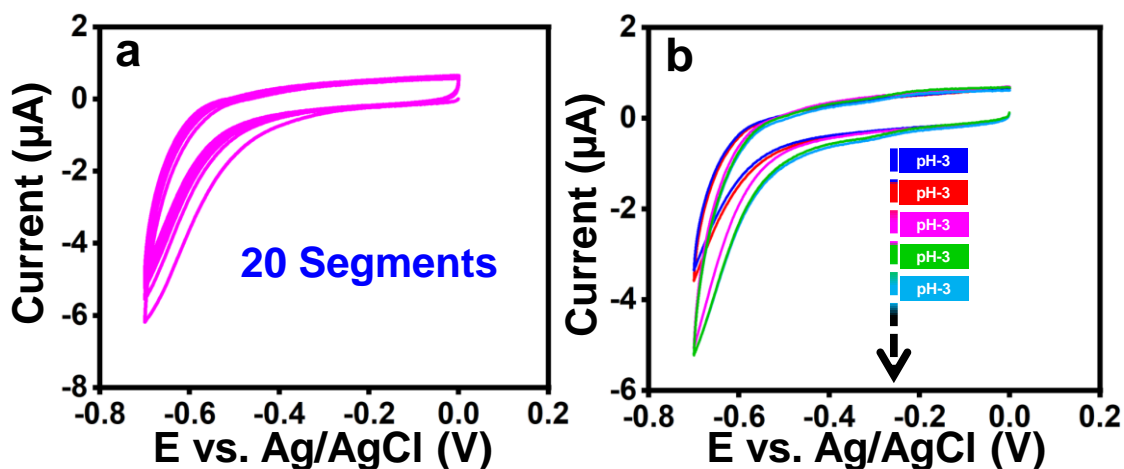

**Figure S4.** (a) Cycle stability of YVO<sub>4</sub>@CN/GCE composite without presence of DMZ. (b) Effect on different pH capacitive current of YVO<sub>4</sub>@CN.

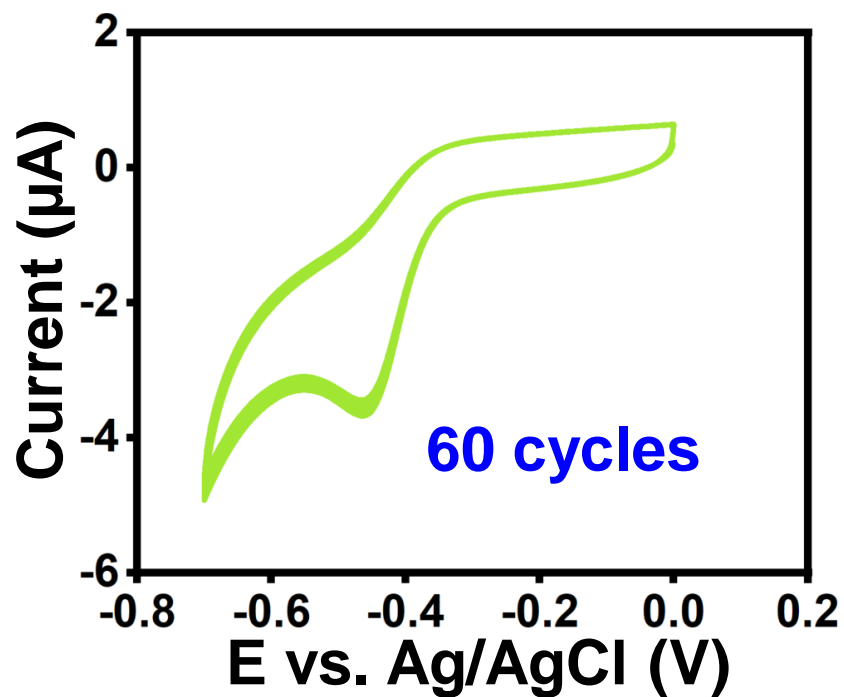

**Figure S5.** Cycle stability of YVO<sub>4</sub>@CN composite in the presence of DMZ.

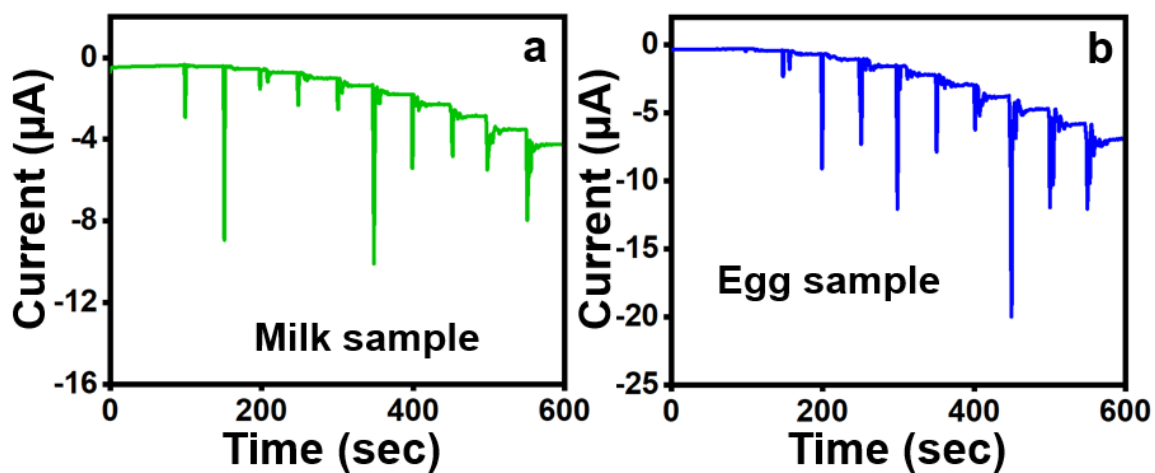

**Figure S6.** Real-sample analysis of DMZ in (a) milk and (b) egg samples.
